# Supplementary material for: Evaluating solvent extraction systems using metabolomics approaches
Source: Royal Society of Chemistry journal article supplement (doi:10.1039/c4ra02731k), 2014-01-01
Supplement: c4ra02731k1.pdf [file c4ra02731k1.pdf]

## Supplementary Figures

### Figure S1-S4

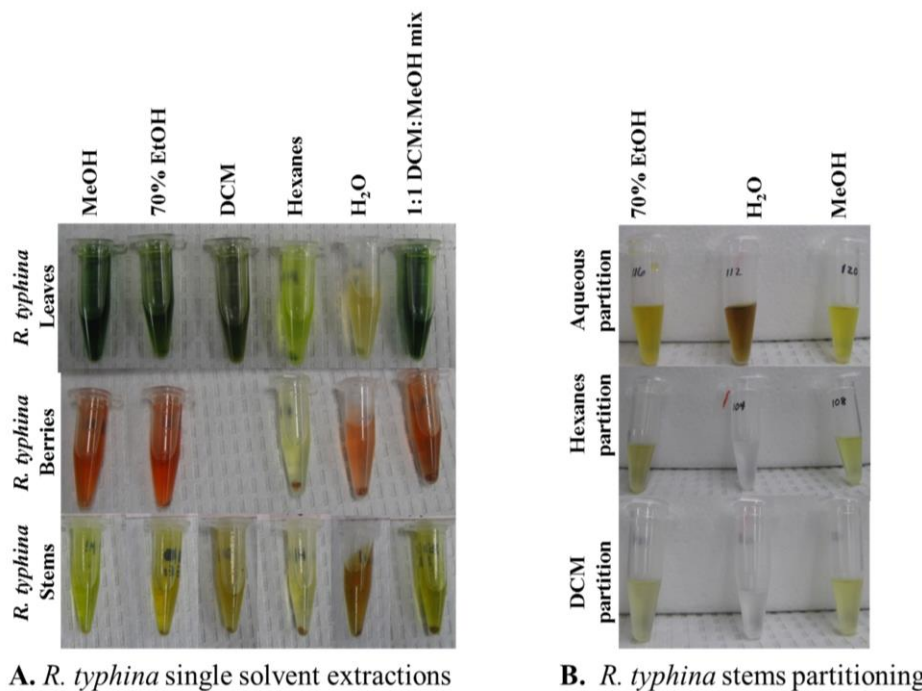

**Figure S1.** Photographs of representative extractions, panel A) single solvent extractions of *R. typhina* tissue from top to bottom: leaves, berries, and stems. Solvent used for the extraction is listed on top. Panel B) representative partitions from *R. typhina* stem tissue. Both leaf and berry tissue looked very similar, with the exception of berry extracts being red rather than green.

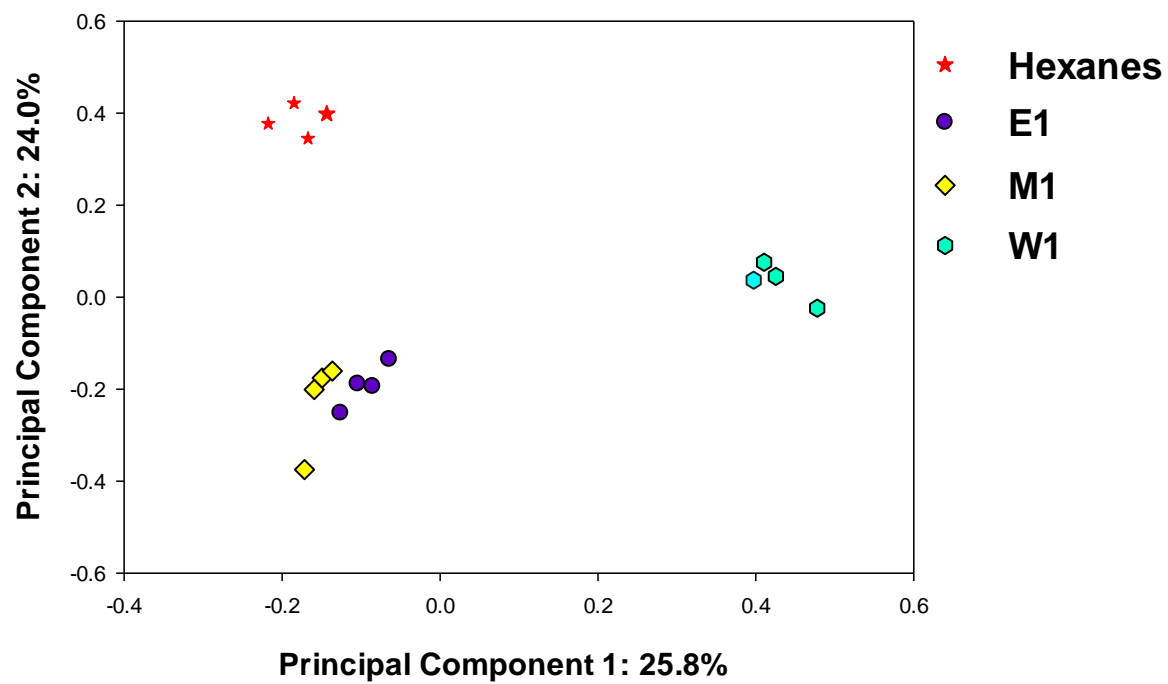

**Figure S2.** Representative principal components analysis of *R. typhina* berry extraction partitions and hexanes single-solvent extraction. The percent of variation explained by each principal component is shown along the appropriate axis. The data are labeled such that they follow the extraction workflow labels described in Fig. 1 where E1, M1, and W1 are the non-polar hexanes partition from an initial extract made with 70% ethanol, methanol, and water, respectively.

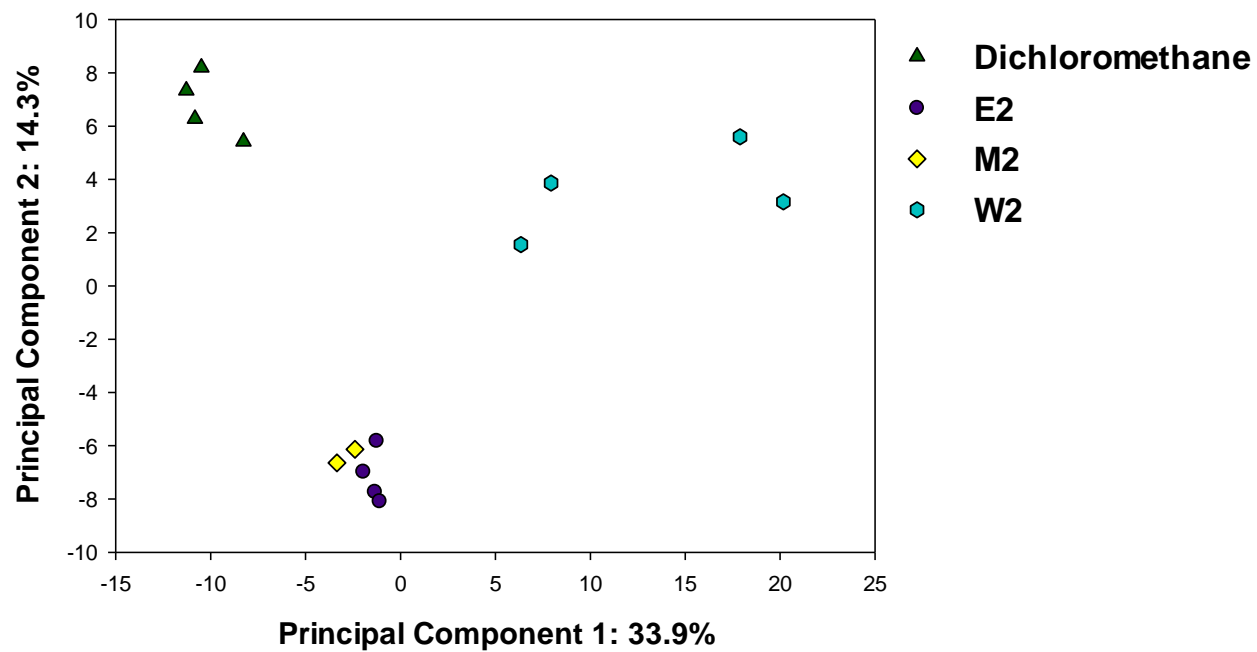

**Figure S3.** Representative principal components analysis of *R. typhina* berry extraction partitions and dichloromethane single-solvent extraction. The percent of variation explained by each principal component is shown along the appropriate axis. The data are labeled such that they follow the extraction workflow labels described in Fig. 1 where E2, M2, and W2 are the medium polarity dichloromethane partition from an initial extract made with 70% ethanol, methanol, and water, respectively.

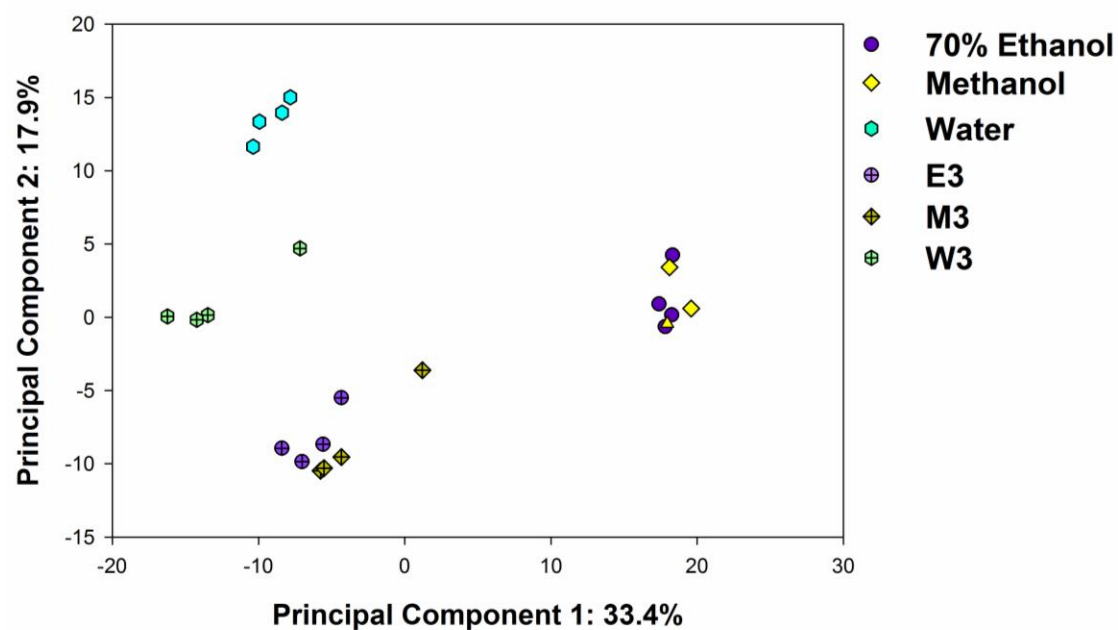

**Figure S4.** Representative principal components analysis of *R. typhina* berry extraction partitions and 70% ethanol, methanol, and water single-solvent extraction. The percent of variation explained by each principal component is shown along the appropriate axis. The data are labeled such that they follow the extraction workflow labels described in Fig. 1 where E3, M3, and W3 are the residual polar alcohol or aqueous phase after partitioning with hexanes and dichloromethane from an initial extract made with 70% ethanol, methanol, and water, respectively.
